# Supplementary material
Source: publisher site journal article supplement (https://www.dovepress.com/article/460161)
Supplement: Supplementary file 1 [file get_supplementary_file.php]

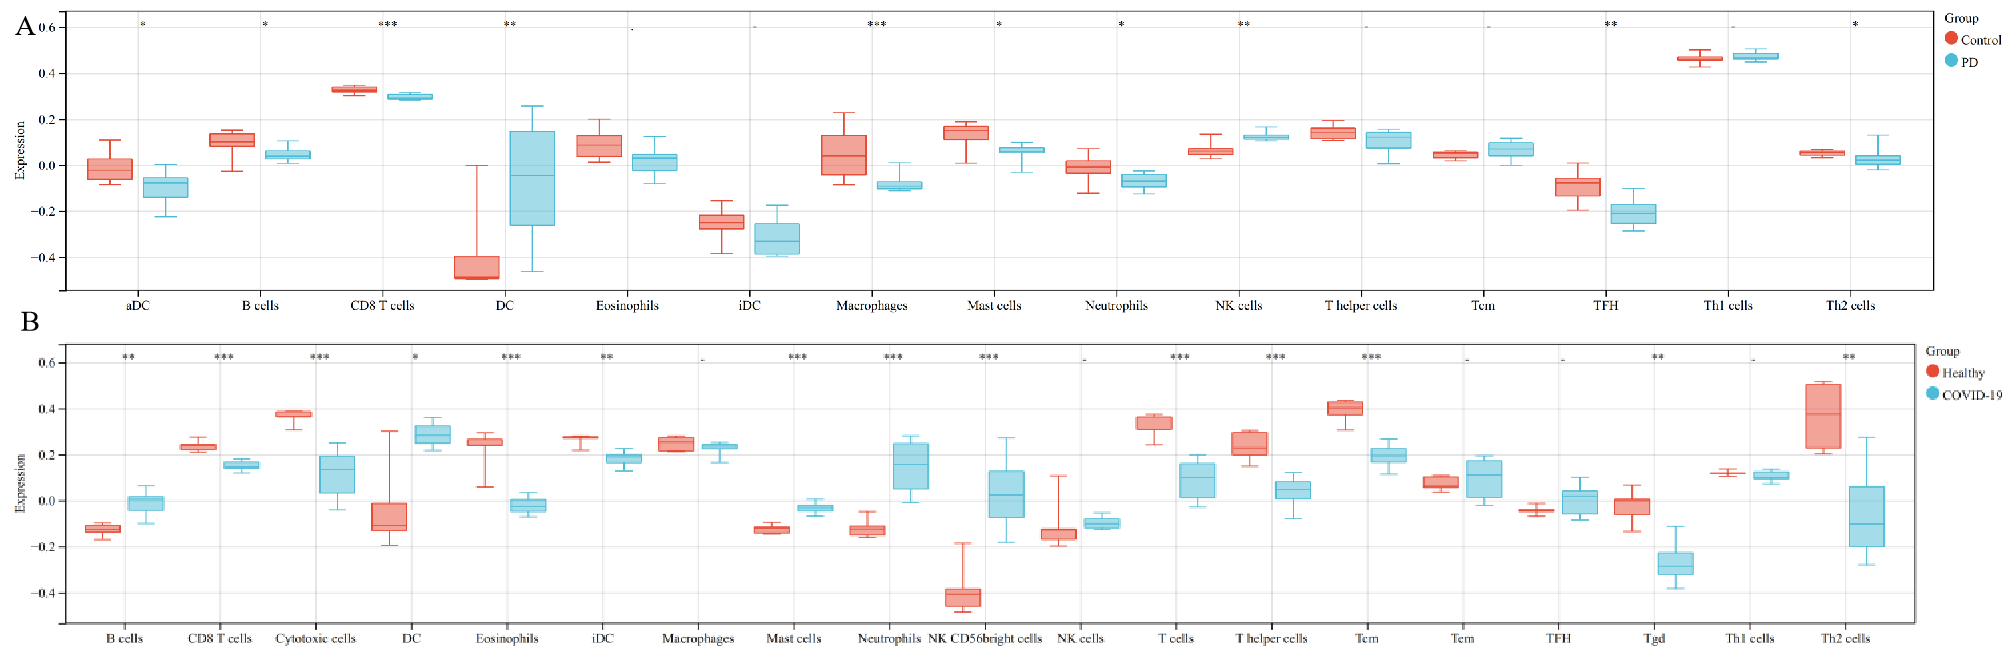


Figure S1 Differential expression of immune cells. (A) Expression of immune cells in the PD group compared to the Control group in the GSE22491 dataset. (B) Expression of immune cells in the COVID-19 group compared to the healthy group in the GSE164805 dataset.


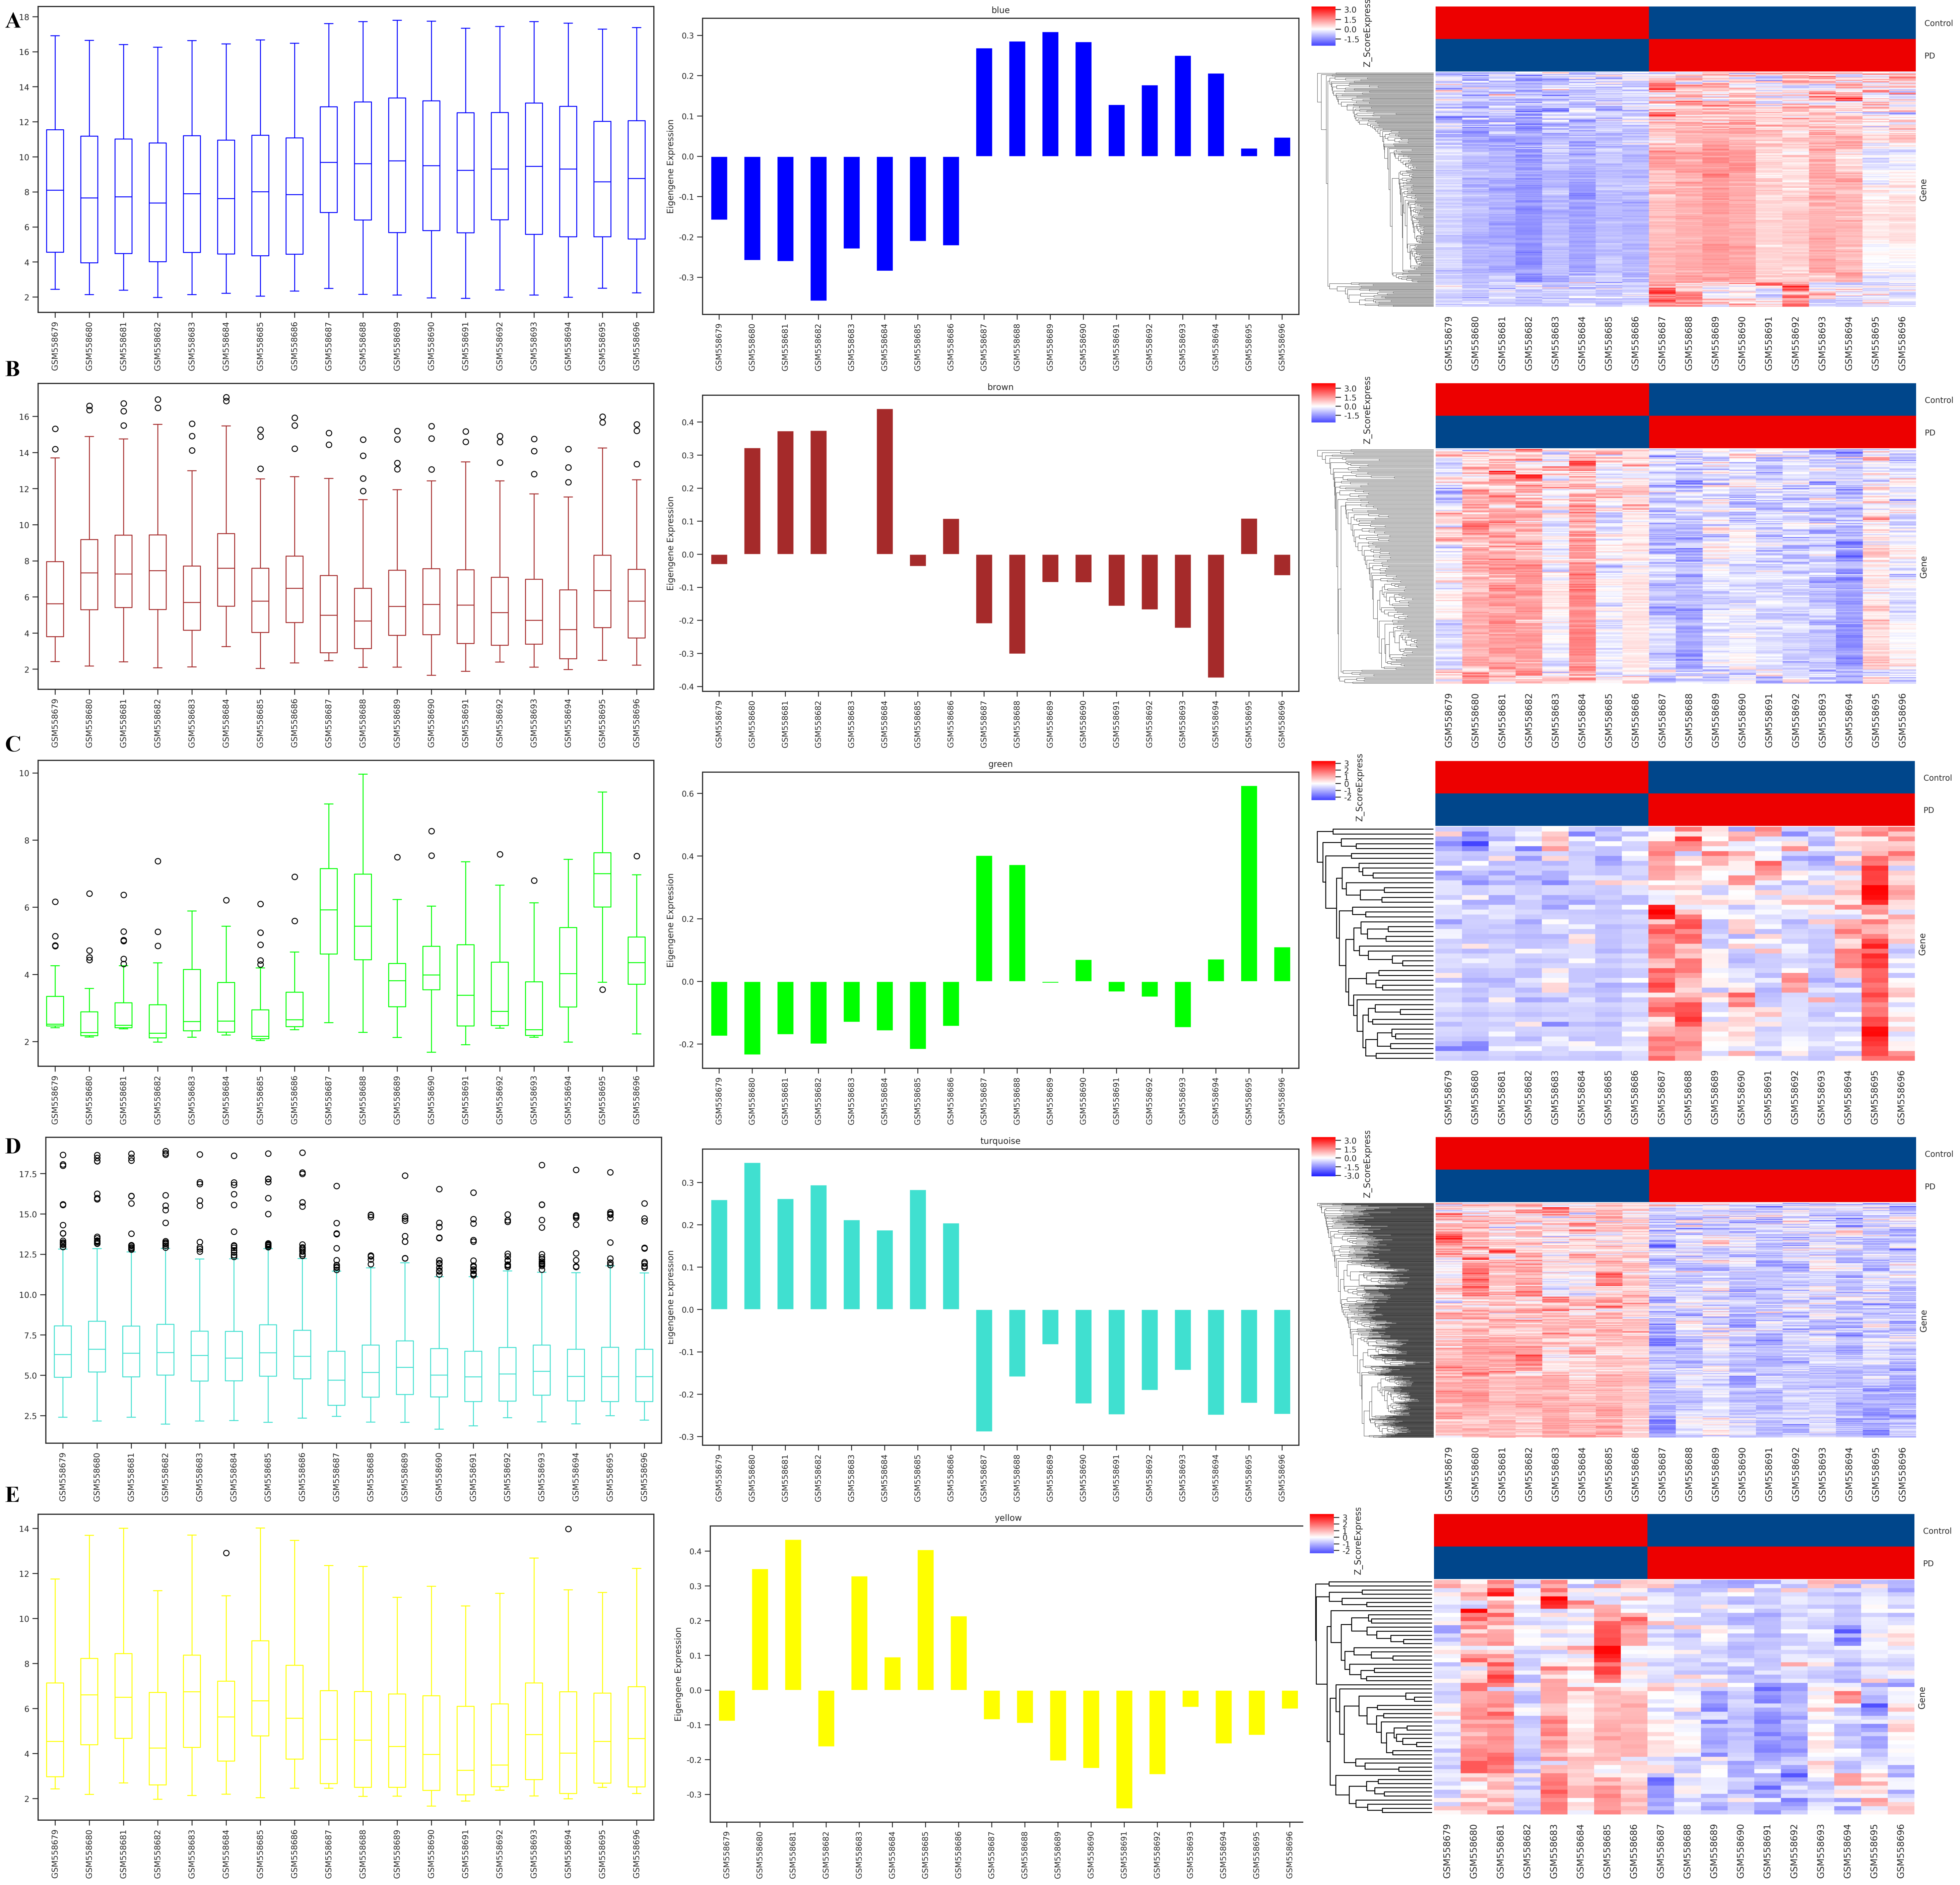


Figure S2 Clustering module analysis. Based on the division results of WGCNA modules, box plot, column plot and heatmap are used to display module gene expression information in the GSE22491 dataset, including (A) blue module, (B) brown module, (C) green module, (D) turquoise module, and (E) yellow module.


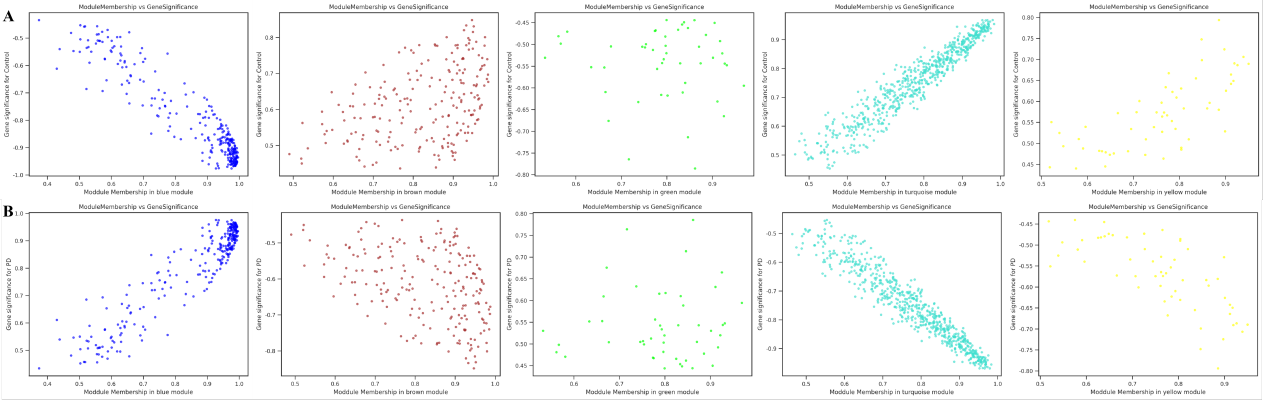


Figure S3 Scatter plot of the association between specific traits and module genes in the GSE22491 dataset. (A) Correlation between healthy controls and 5 modules. (B) Correlation between PD and 5 modules.


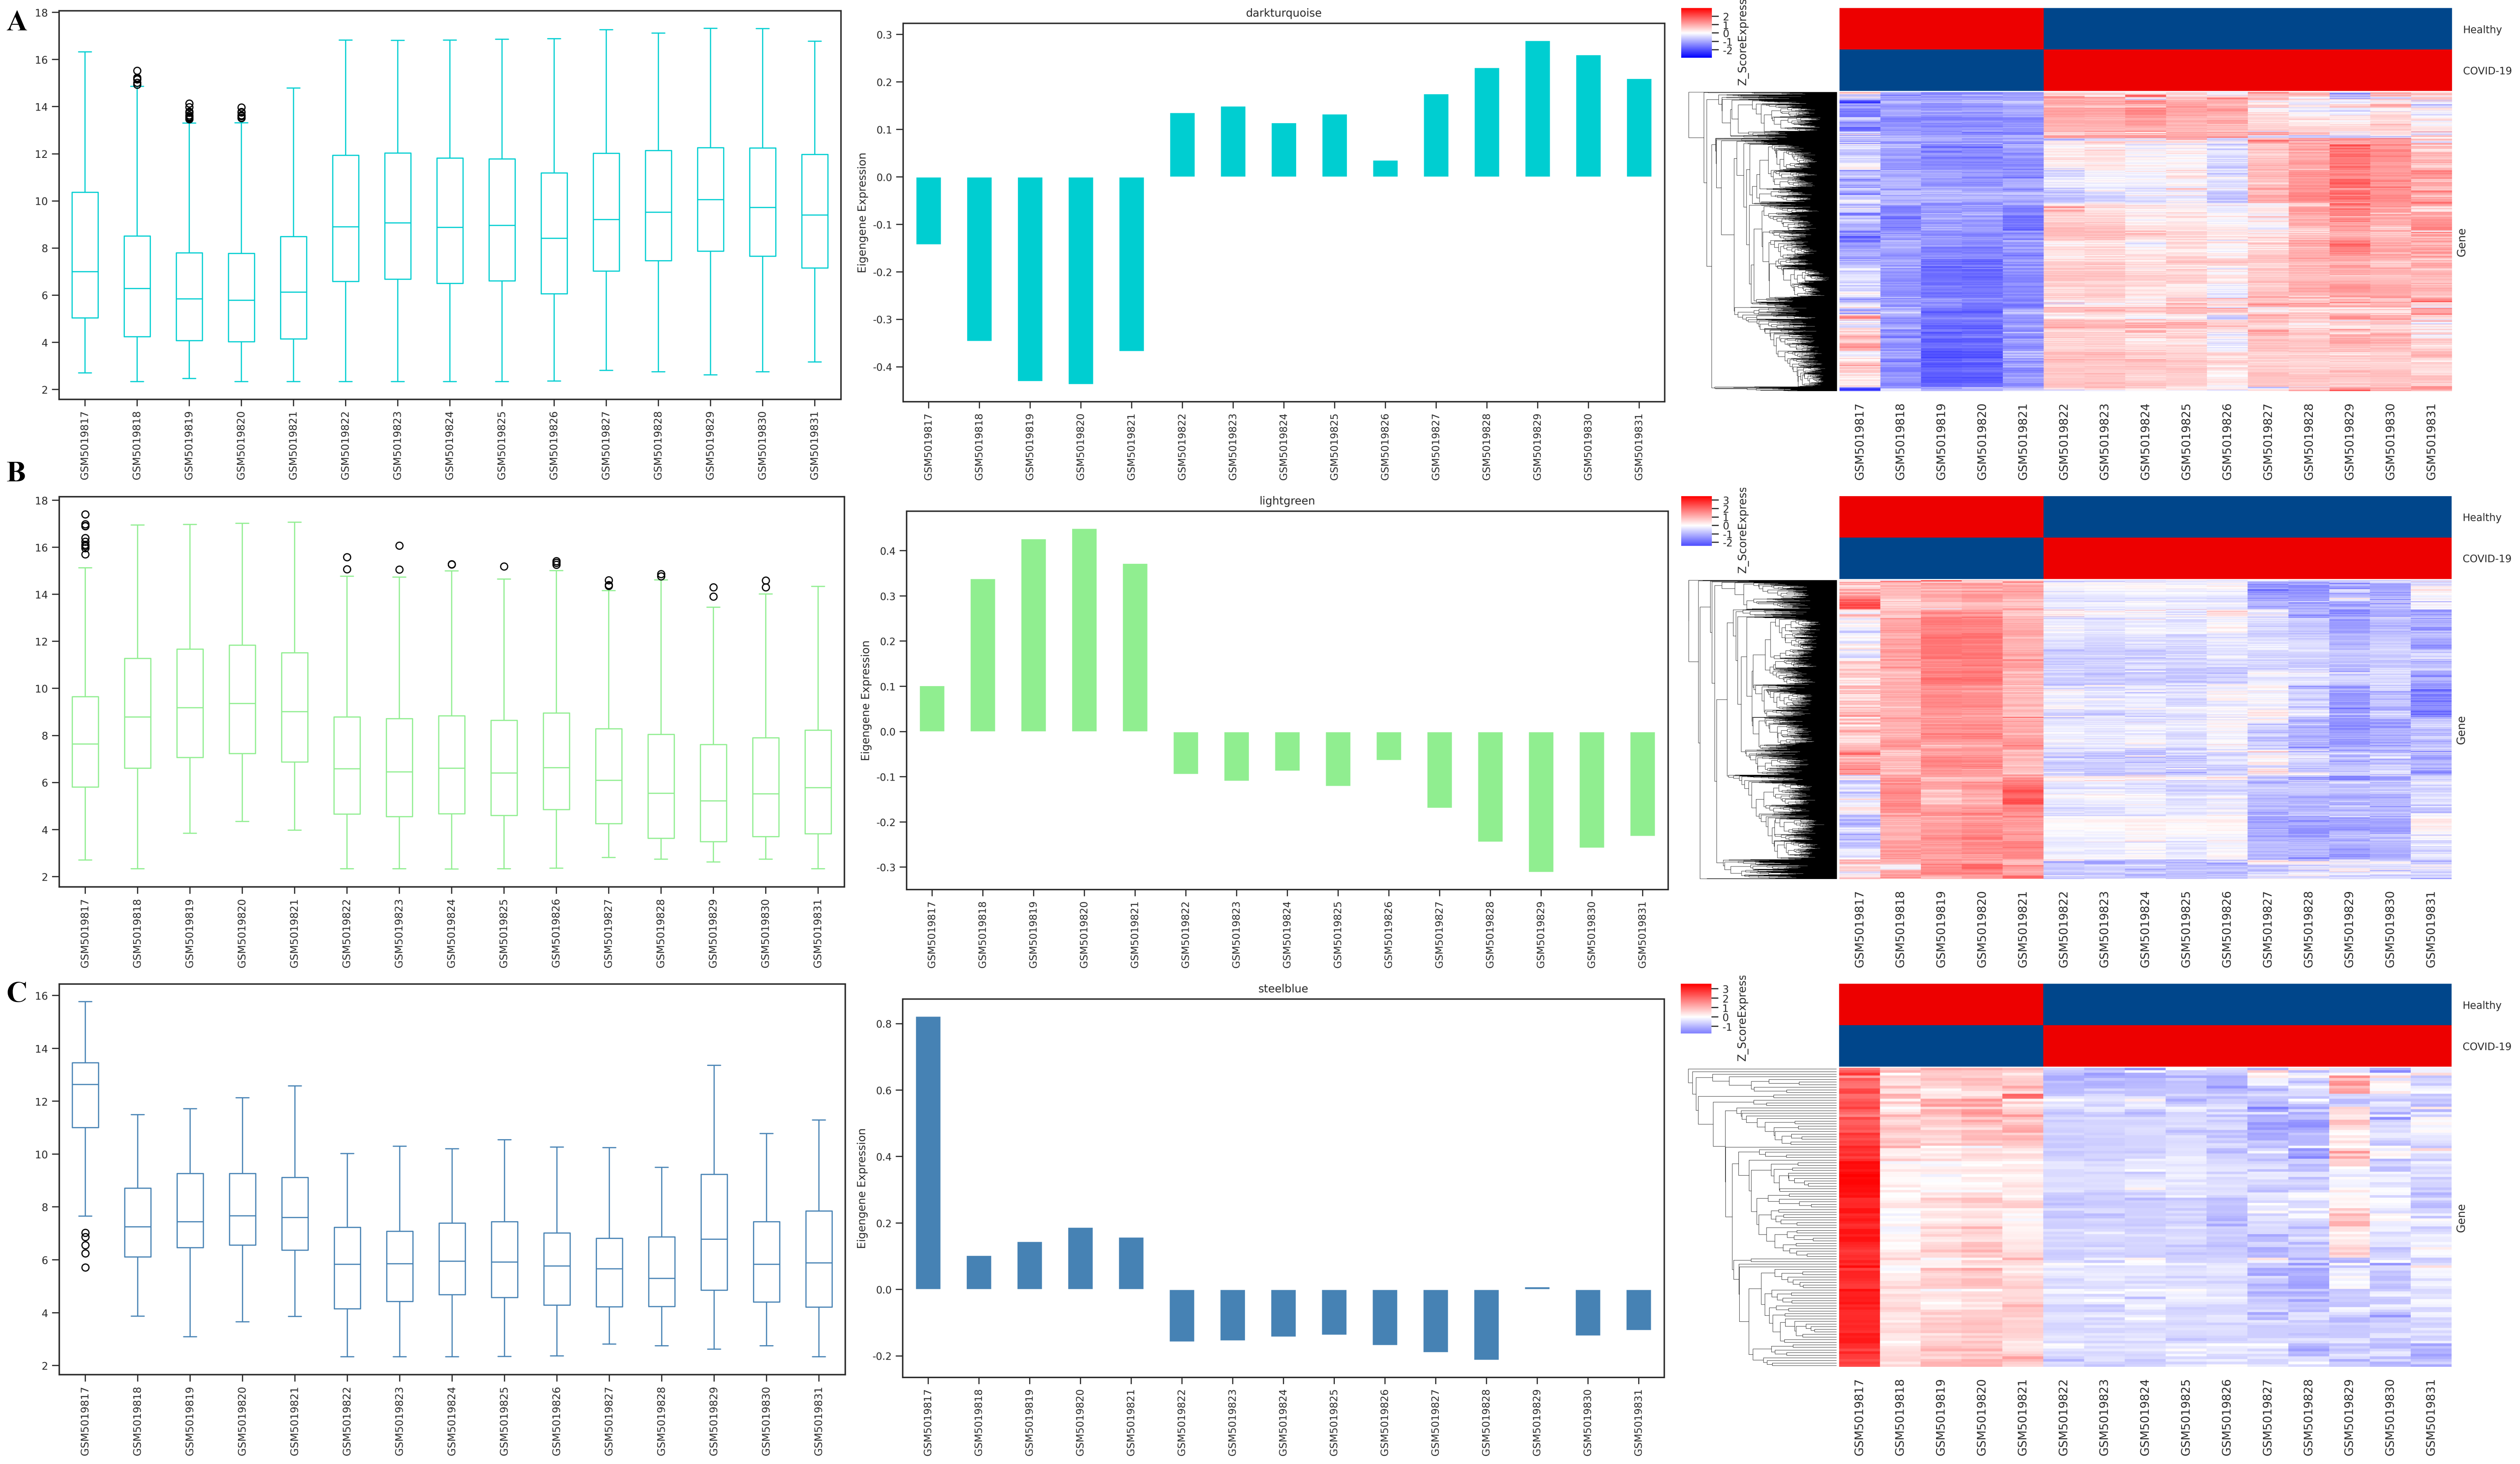


Figure S4 Clustering module analysis. Based on the division results of WGCNA modules, box plot, column plot and heatmap are used to display module gene expression information in the GSE164805 dataset, including (A) darkturquoise module, (B) lightgreen module, and (C) steelblue module.


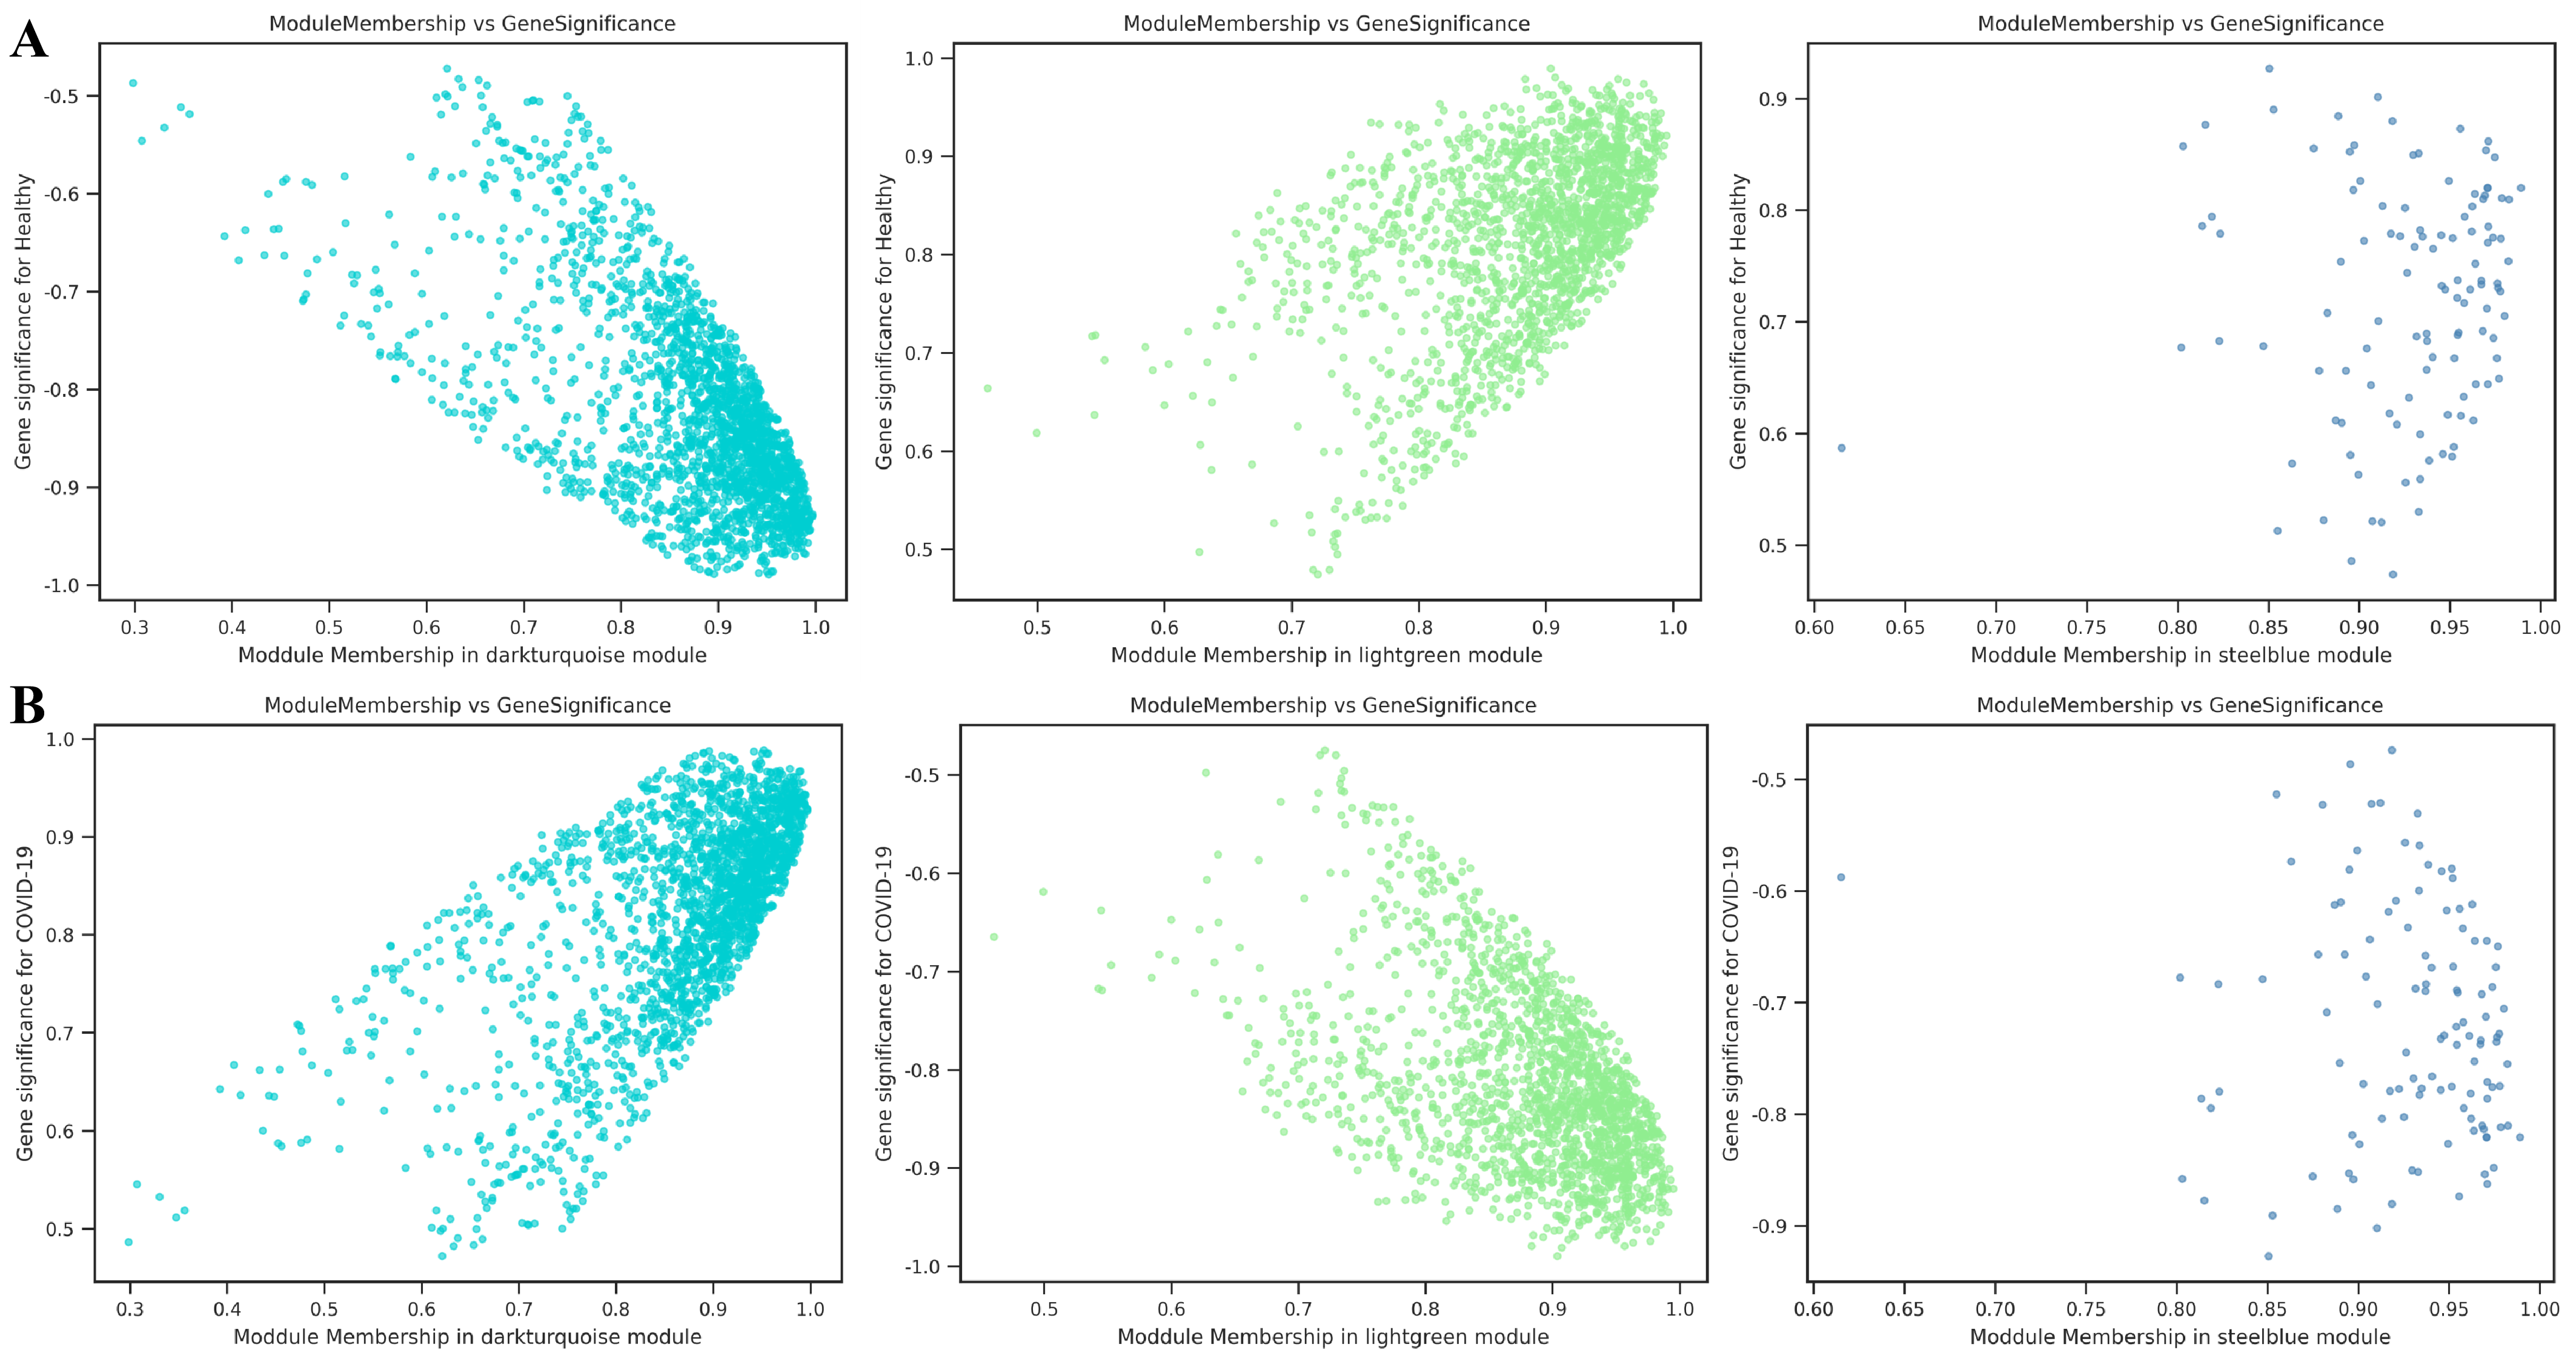


Figure S5 Scatter plot of the association between specific traits and module genes in the GSE164805 dataset. (A) Correlation between healthy controls and 3 modules. (B) Correlation between COVID-19 and 3 modules.


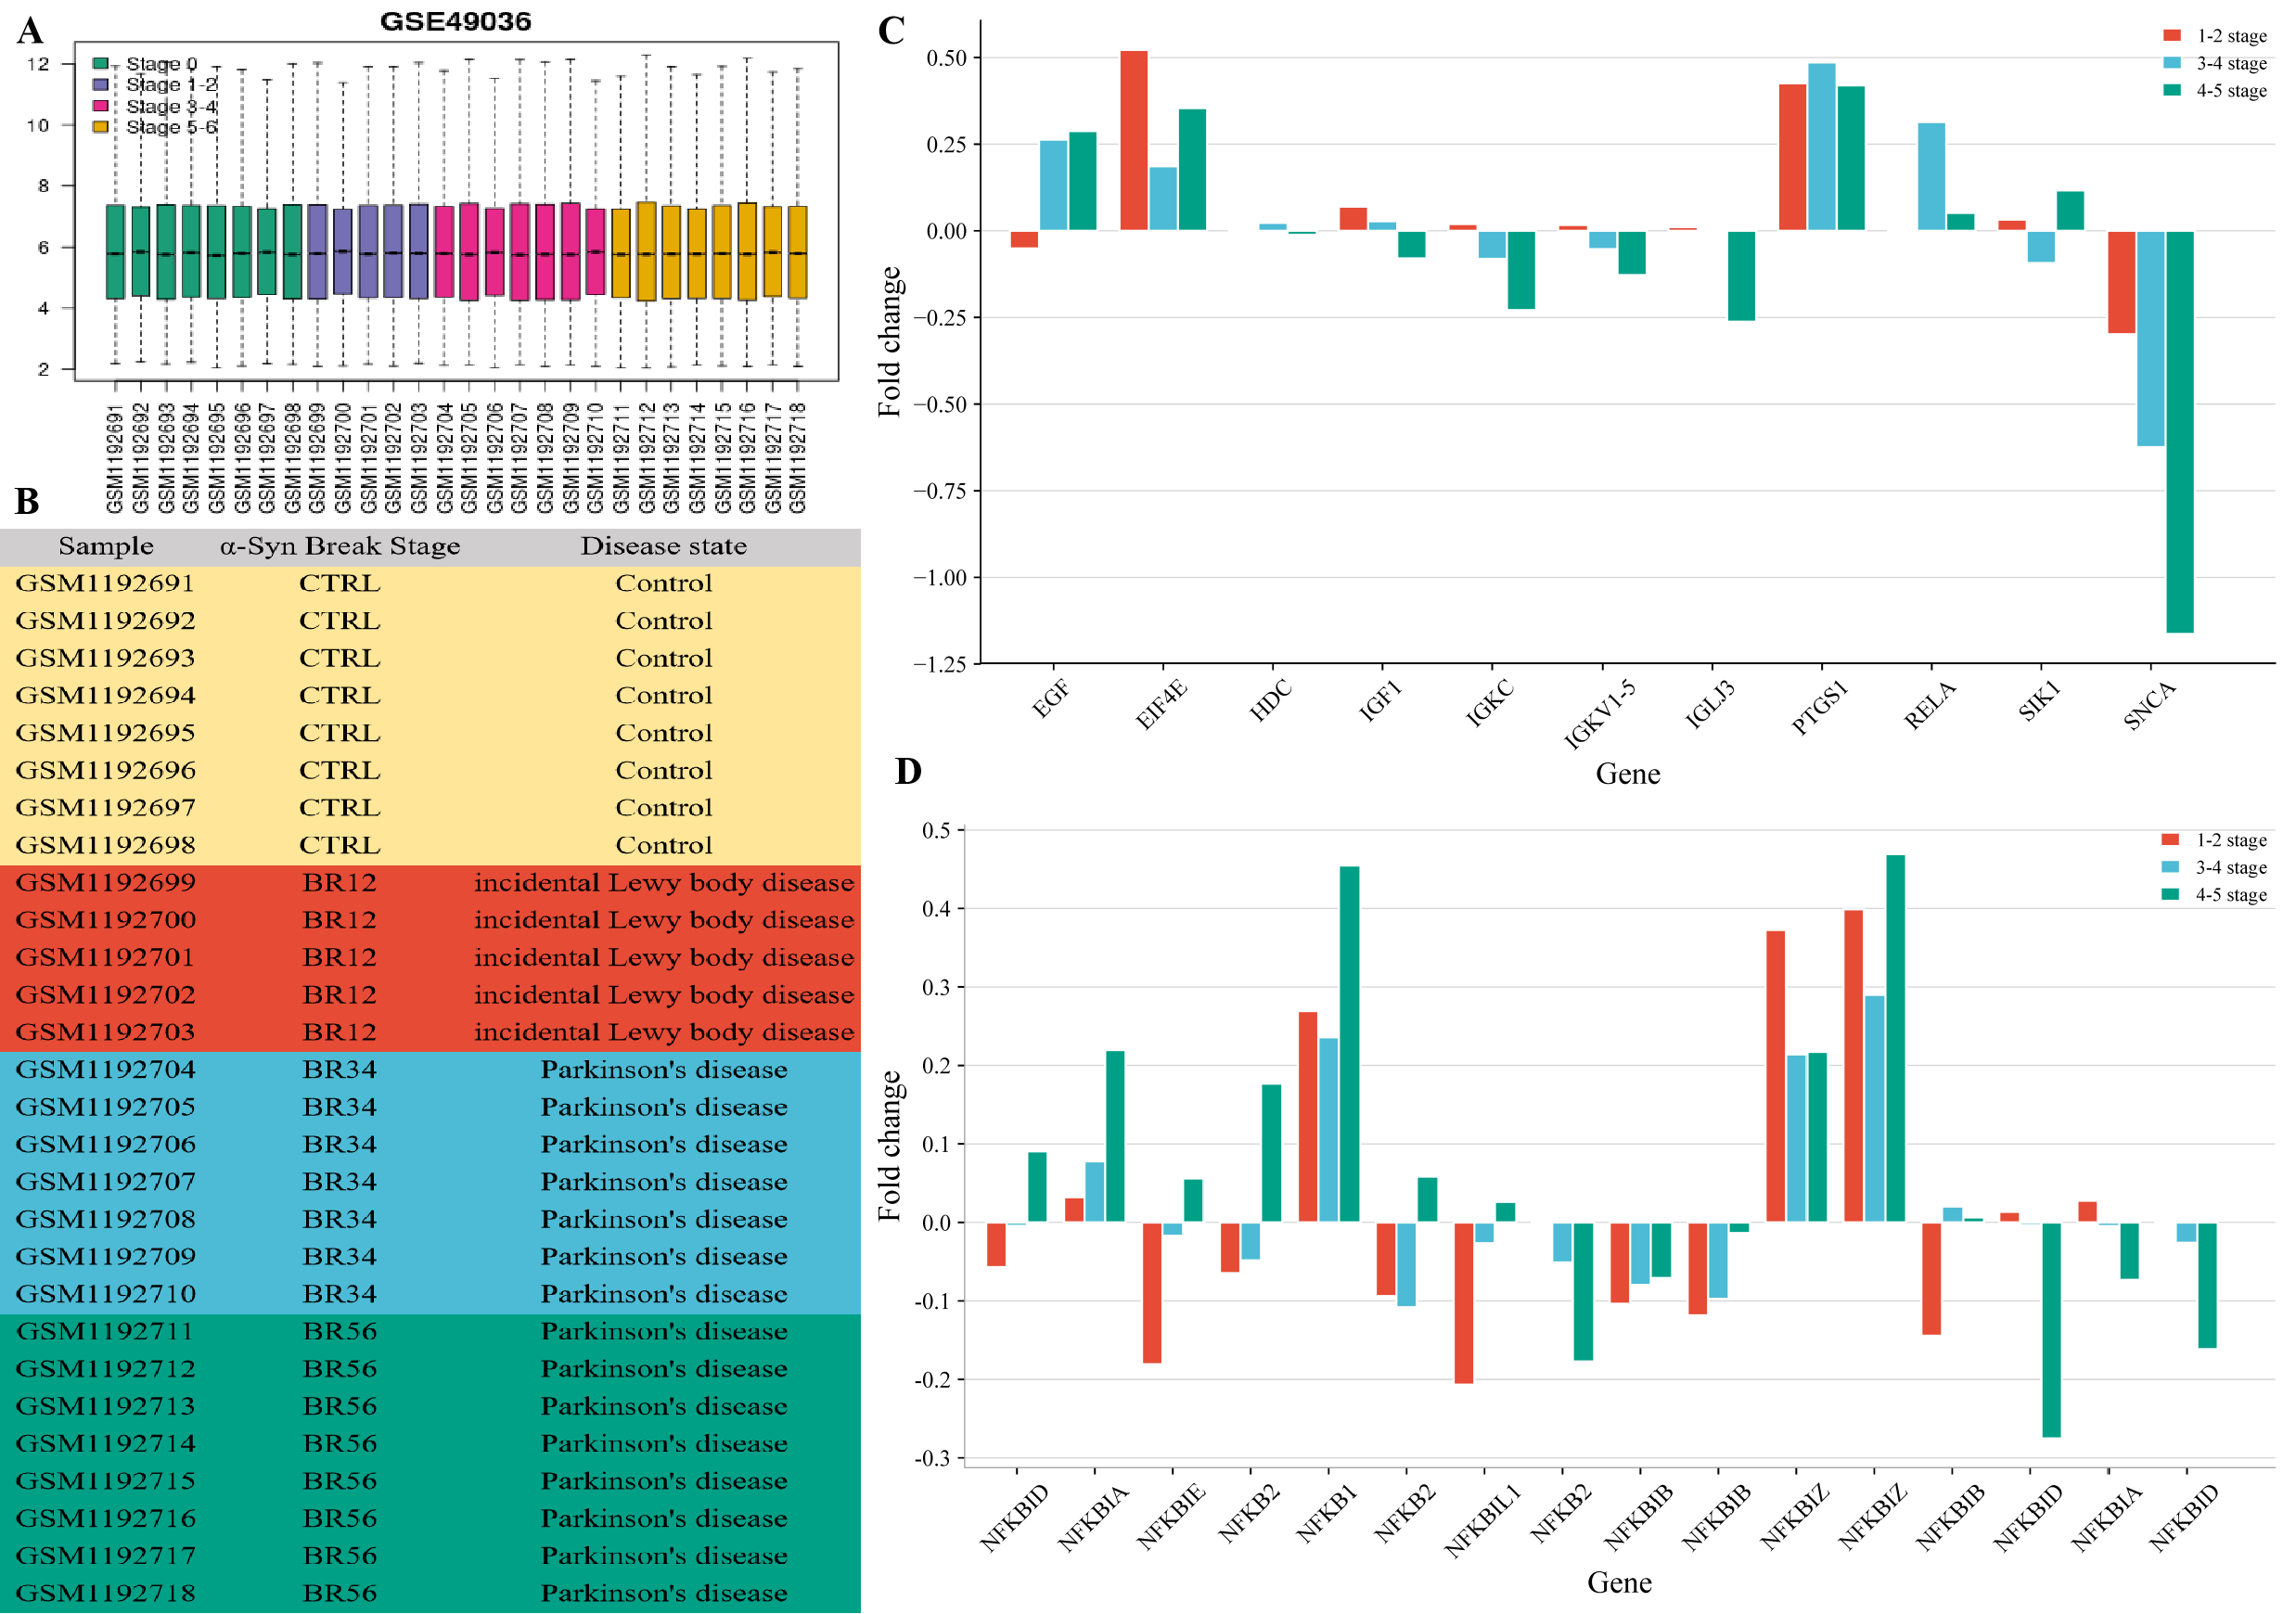


Figure S6 Validation of *SNCA* expression level in GSE49036 dataset (A) sample information of GSE49036 dataset. (B) The pathological Stage of α-Syn in 28 samples was divided into Braak α-synuclein Stage 0 (Control); Braak α-Syn stage 1-2 (incidental Lewy body disease); Braak α-Syn 3-4 and Braak α-Syn stages 5-6 (PD). (C) Compared with stage 1-2, the expression differences of EGF, EIF4E, HDC, IGF1, IGKC, IGKV1-5, IGLJ3, PTGS1, RELA, SIK1, SNCA in PD samples were more significant with the aggravation of pathological process, especially in stage 5-6.(D) Compared with stage 1-2, the expression differences of NF-κB family in PD samples were more significant with the aggravation of pathological process, especially in stage 5-6.


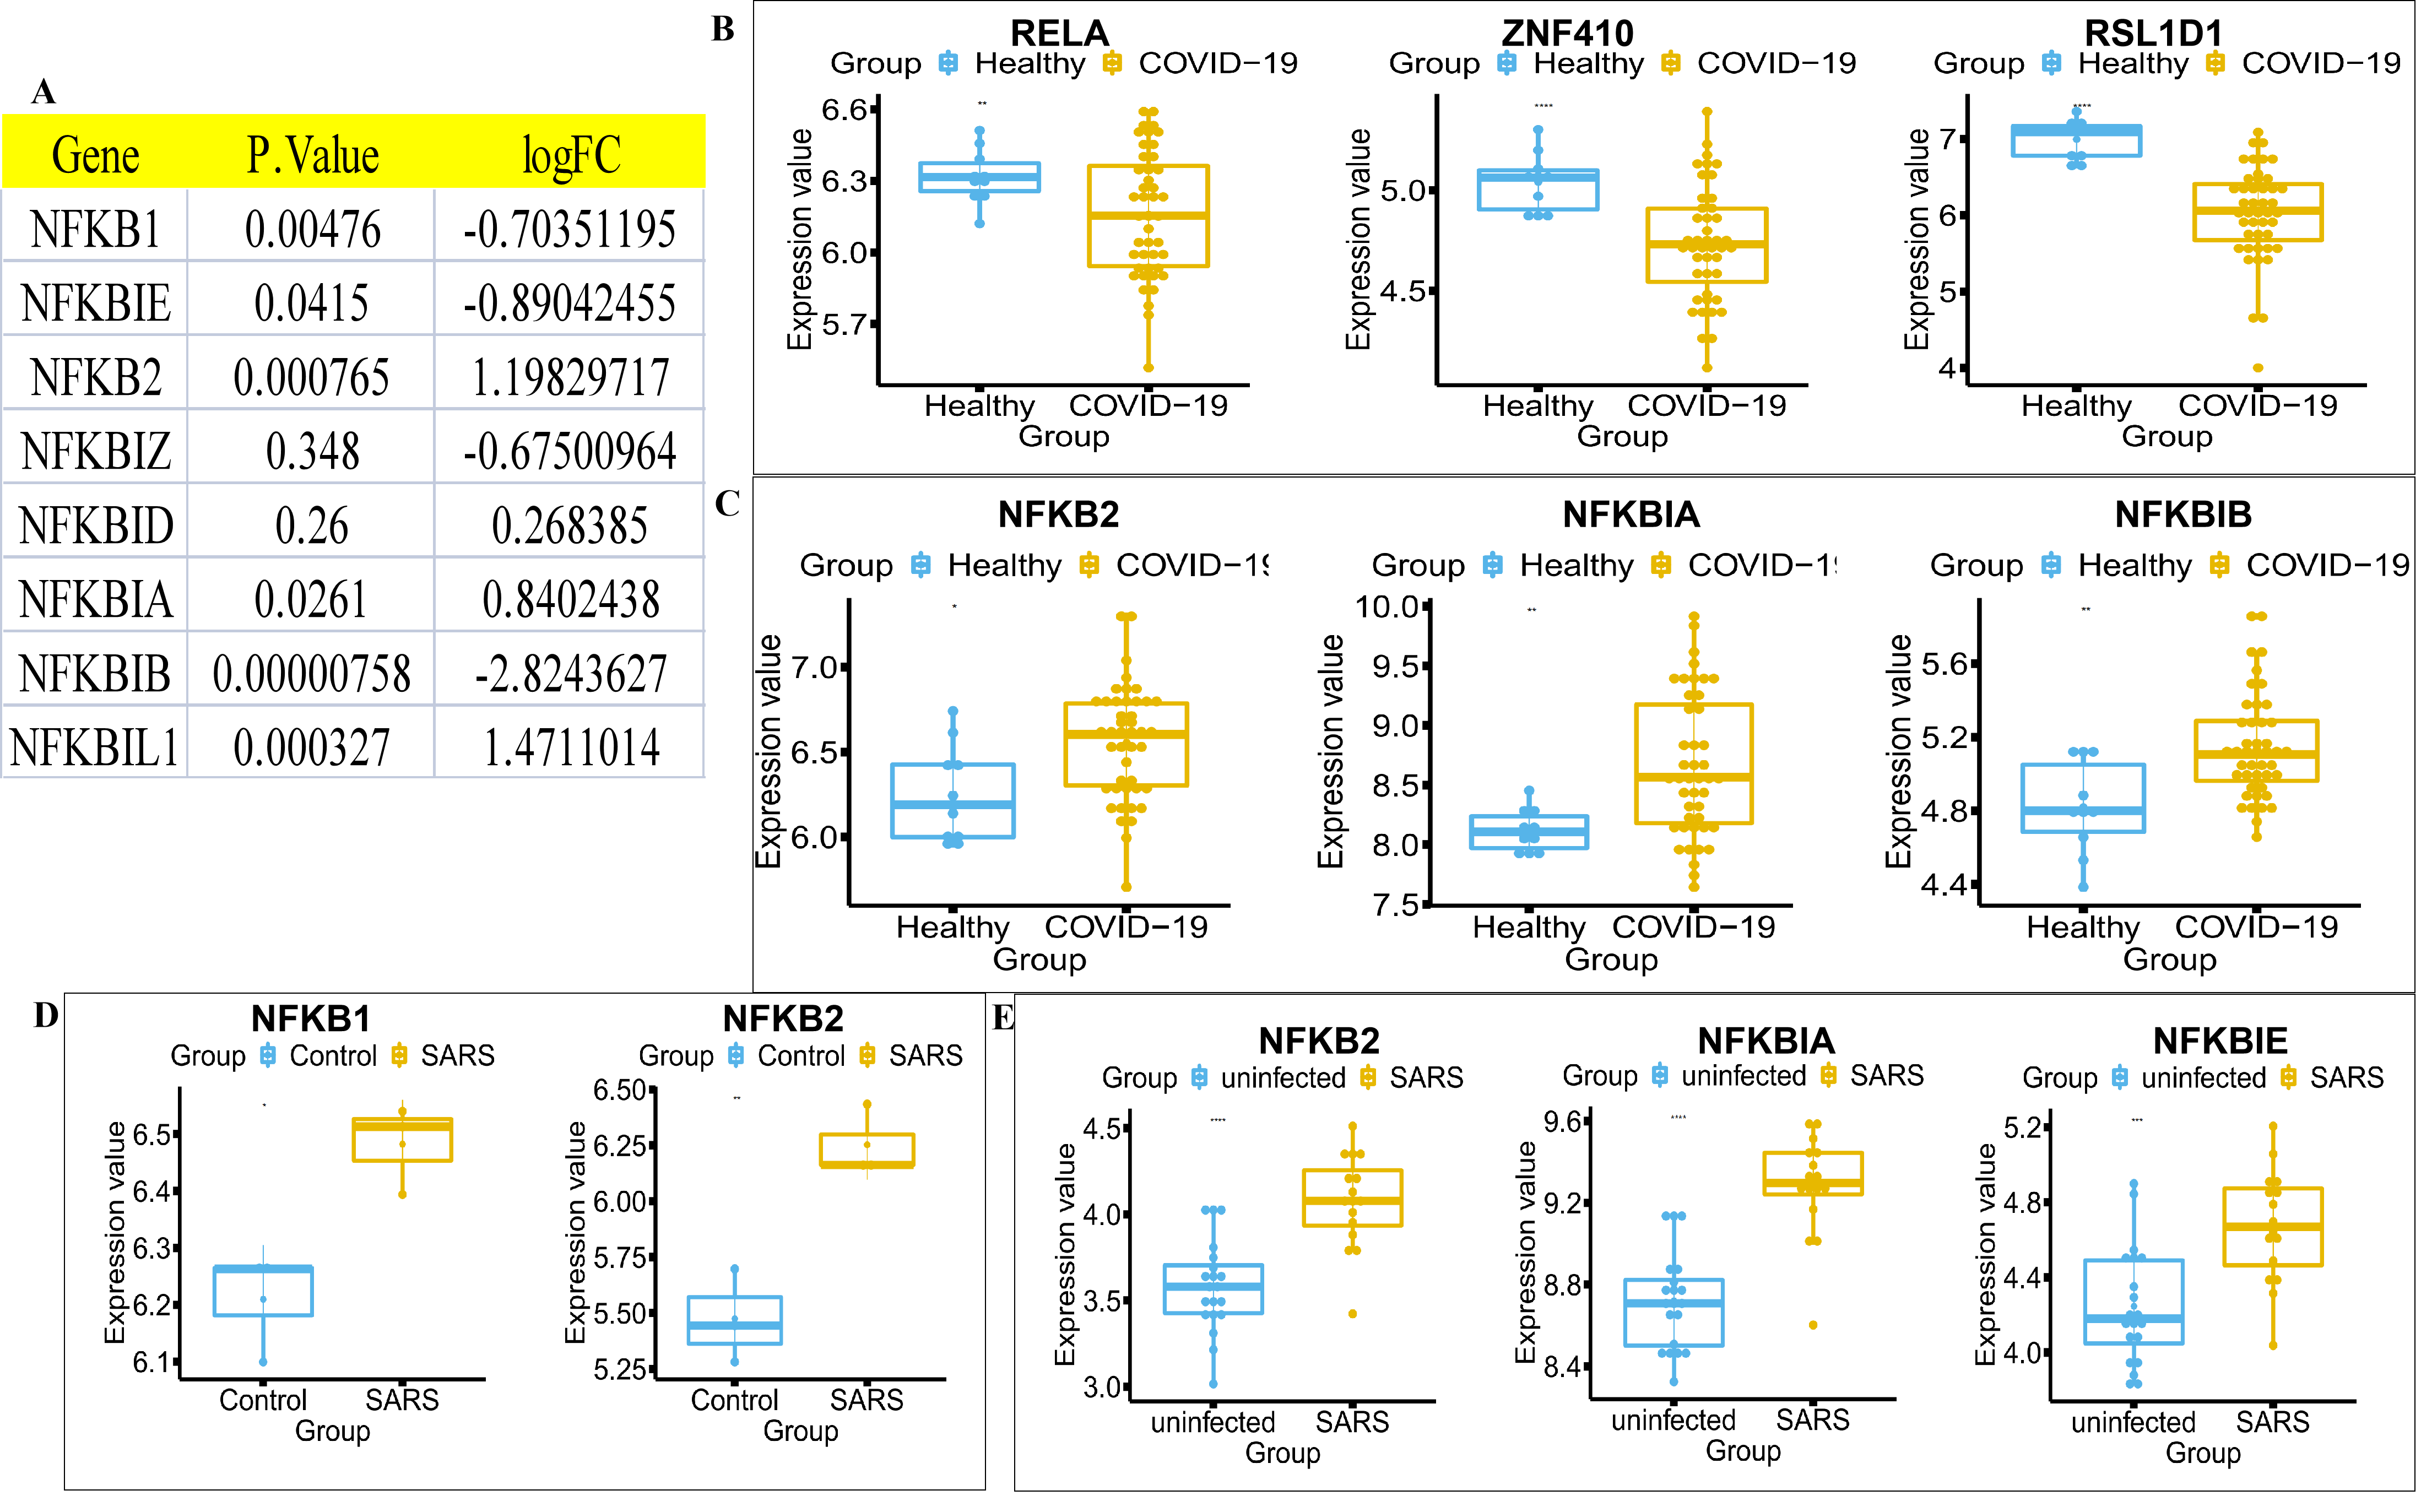


Figure S7 Reliability verification of DEGs (A) Differential expression of NF-κB-related factors compared with the healthy controls. (B) and (C) GSE171110 dataset. (D) GSE153970 dataset. (E) GSE175779 dataset. The boxplot in the differential expression module has designed to draw a boxplot to present the expression difference of a gene between different pathological and physiological conditions. This analysis provides three statistic methods to quantify the significant difference. (*: *P*<=0.05; **: *P*<=0.01; ***: *P*<=0.001; ****: *P*<=0.0001)


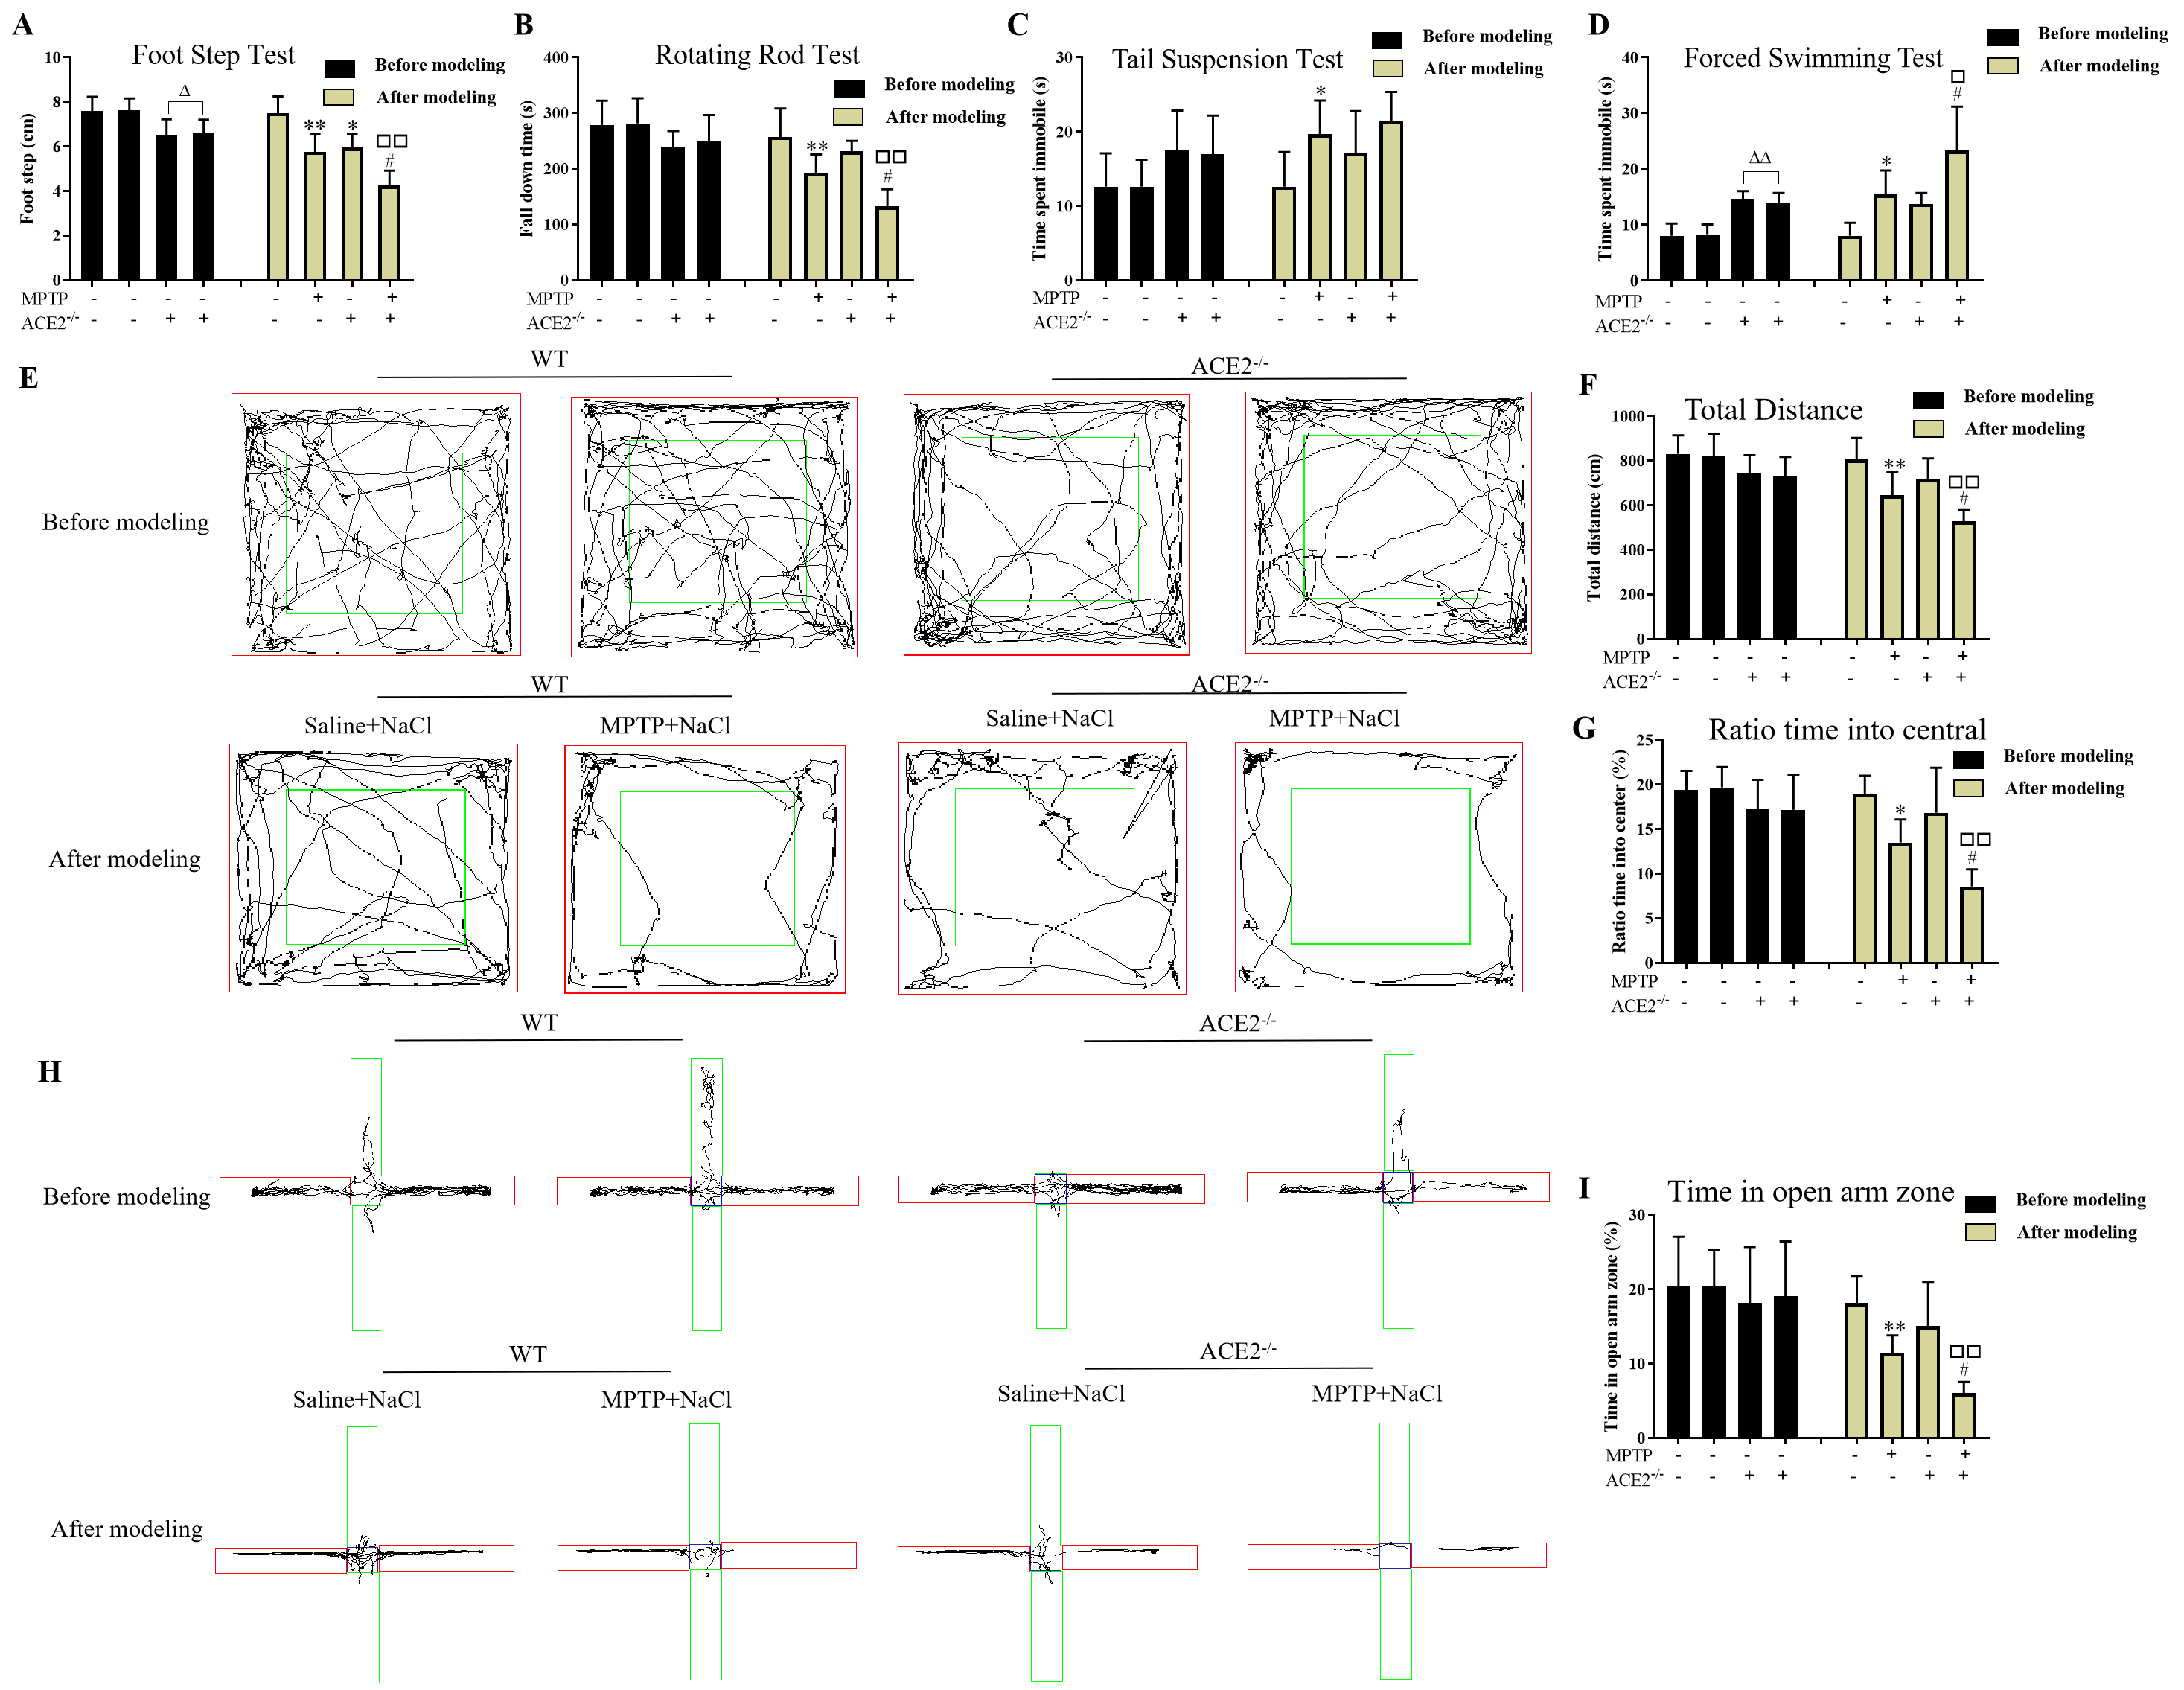


Figure S8 Behavioral tests. (A) Foot step test. (B) Rotarod test. (C) Tail suspension test. (D) Forced swimming. (E) Open field test. (F) Statistical plot of total distance moved by mice. (G) Statistical plot of the percentage of mouse movement into the central region. (H) Elevated plus maze test. (I) Percentage of time mice entered the open arm zone. Compared with wild type group, ∆*P* < 0.5, ∆∆*P* < 0.01; Compared with the Saline group, **P* < 0.05, ***P* < 0.01; Compared with the MPTP group, #*P* < 0.05; Compared with the ACE2-nullgroup, 🞎*P* < 0.5, 🞎🞎*P* < 0.01.


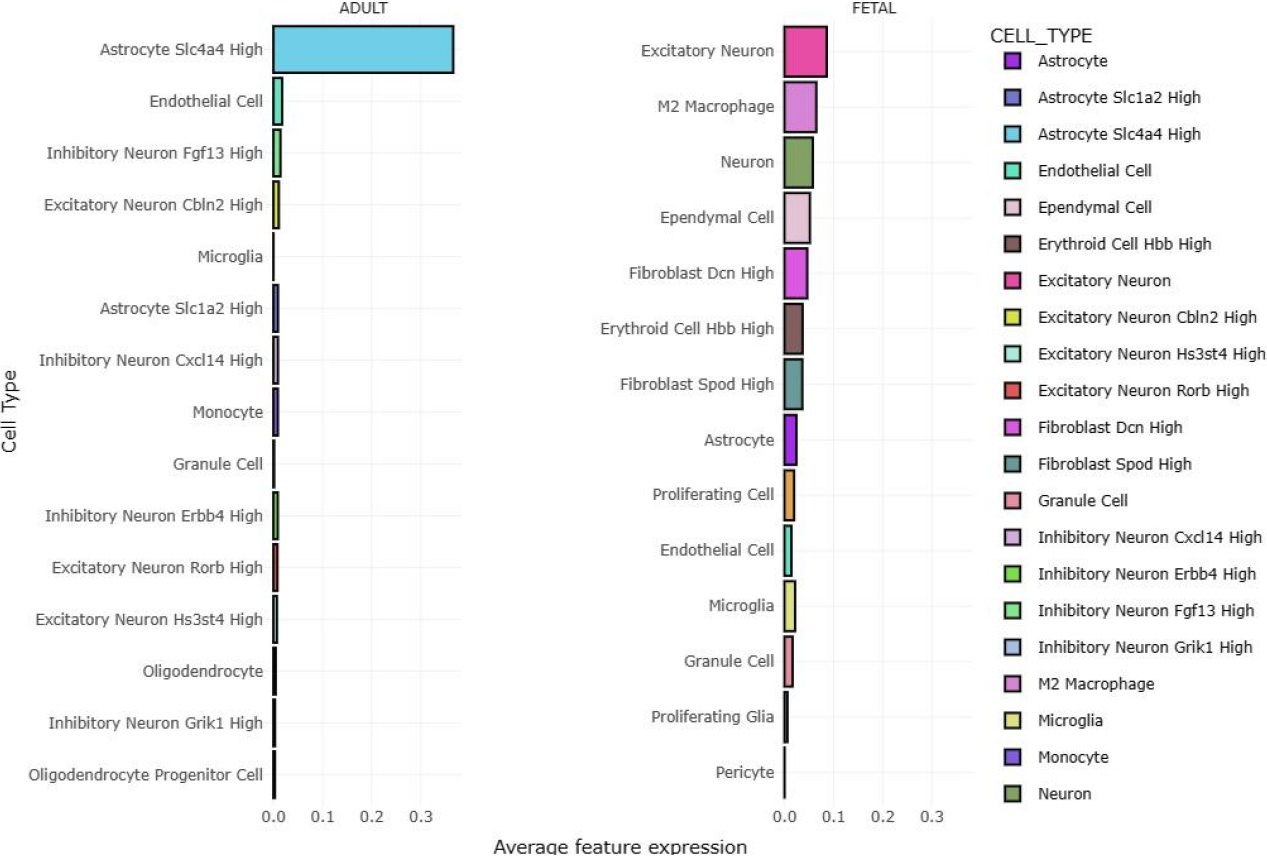


Figure S9 The content of ACE2 in different cells of the brain during fetal and adulthood.

Table S1 Clinical characteristics of samples from the PD dataset

| Sample | Title | Group | Cell type |
| --- | --- | --- | --- |
| GSM558679 | Control sample N1 | Control | peripheral blood mononuclear cells (PBMCs) |
| GSM558680 | Control sample N2 | Control | peripheral blood mononuclear cells (PBMCs) |
| GSM558681 | Control sample N3 | Control | peripheral blood mononuclear cells (PBMCs) |
| GSM558682 | Control sample N4 | Control | peripheral blood mononuclear cells (PBMCs) |
| GSM558683 | Control sample N5 | Control | peripheral blood mononuclear cells (PBMCs) |
| GSM558684 | Control sample N6 | Control | peripheral blood mononuclear cells (PBMCs) |
| GSM558685 | Control sample N7 | Control | peripheral blood mononuclear cells (PBMCs) |
| GSM558686 | Control sample N8 | Control | peripheral blood mononuclear cells (PBMCs) |
| GSM558687 | PD sample #A | PD | peripheral blood mononuclear cells (PBMCs) |
| GSM558688 | PD sample #B | PD | peripheral blood mononuclear cells (PBMCs) |
| GSM558689 | PD sample #C | PD | peripheral blood mononuclear cells (PBMCs) |
| GSM558690 | PD sample #D | PD | peripheral blood mononuclear cells (PBMCs) |
| GSM558691 | PD sample #E | PD | peripheral blood mononuclear cells (PBMCs) |
| GSM558692 | PD sample #F | PD | peripheral blood mononuclear cells (PBMCs) |
| GSM558693 | PD sample #G | PD | peripheral blood mononuclear cells (PBMCs) |
| GSM558694 | PD sample #H | PD | peripheral blood mononuclear cells (PBMCs) |
| GSM558695 | PD sample #I | PD | peripheral blood mononuclear cells (PBMCs) |
| GSM558696 | PD sample #J | PD | peripheral blood mononuclear cells (PBMCs) |

Table S2 Clinical characteristics of samples from the COVID-19 dataset

| Sample | Title | Source name | Cell type | Disease | Gender | Age | Group |
| --- | --- | --- | --- | --- | --- | --- | --- |
| GSM5019817 | PBMC_healthy_subject1 | PBMC,HC | peripheral blood mononuclear cells (PBMCs) | healthy | male | 62 |  |
| GSM5019818 | PBMC_healthy_subject2 | PBMC,HC | peripheral blood mononuclear cells (PBMCs) | healthy | male | 56 |  |
| GSM5019819 | PBMC_healthy_subject3 | PBMC,HC | peripheral blood mononuclear cells (PBMCs) | healthy | male | 54 |  |
| GSM5019820 | PBMC_healthy_subject4 | PBMC,HC | peripheral blood mononuclear cells (PBMCs) | healthy | male | 71 |  |
| GSM5019821 | PBMC_healthy_subject5 | PBMC,HC | peripheral blood mononuclear cells (PBMCs) | healthy | female | 56 |  |
| GSM5019822 | PBMC_mild_patient_subject1 | PBMC,mild patient | peripheral blood mononuclear cells (PBMCs) | COVID-19 | male | 55 | mild |
| GSM5019823 | PBMC_mild_patient_subject2 | PBMC,mild patient | peripheral blood mononuclear cells (PBMCs) | COVID-19 | male | 44 | mild |
| GSM5019824 | PBMC_mild_patient_subject3 | PBMC,mild patient | peripheral blood mononuclear cells (PBMCs) | COVID-19 | male | 51 | mild |
| GSM5019825 | PBMC_mild_patient_subject4 | PBMC,mild patient | peripheral blood mononuclear cells (PBMCs) | COVID-19 | male | 54 | mild |
| GSM5019826 | PBMC_mild_patient_subject5 | PBMC,mild patient | peripheral blood mononuclear cells (PBMCs) | COVID-19 | female | 53 | mild |
| GSM5019827 | PBMC_severe patient_subject1 | PBMC,severe patient | peripheral blood mononuclear cells (PBMCs) | COVID-19 | male | 54 | severe |
| GSM5019828 | PBMC_severe patient_subject2 | PBMC,severe patient | peripheral blood mononuclear cells (PBMCs) | COVID-19 | male | 52 | severe |
| GSM5019829 | PBMC_severe patient_subject3 | PBMC,severe patient | peripheral blood mononuclear cells (PBMCs) | COVID-19 | male | 73 | severe |
| GSM5019830 | PBMC_severe patient_subject4 | PBMC,severe patient | peripheral blood mononuclear cells (PBMCs) | COVID-19 | male | 51 | severe |
| GSM5019831 | PBMC_severe patient_subject5 | PBMC,severe patient | peripheral blood mononuclear cells (PBMCs) | COVID-19 | male | 60 | severe |
